# Supplementary material for: Facile fabrication of BiOCl nanoplates with high exposure {001} facets for efficient photocatalytic degradation of nitro explosives
Source: Royal Society of Chemistry journal article supplement (doi:10.1039/d0qi01218a), 2020-11-16
Supplement: d0qi01218a1.pdf [file d0qi01218a1.pdf]

Supporting information for  
**Facile fabrication of BiOCl nanoplates with high exposure {001}  
facets for efficient photocatalytic degradation of nitro explosives**

Jing Yan<sup>a</sup>, Bo Jin<sup>a\*</sup>, Ping Zhao<sup>a</sup>, and Rufang Peng<sup>a</sup>

<sup>a</sup>State Key Laboratory of Environment-friendly Energy Materials, School of Materials Science and Engineering,

Southwest University of Science and Technology, Mianyang, 621010, China

\*E-mail: jinbo0428@163.com

**Table. S1** The sizes and thicknesses of products with different CA additions.

| Products | Size(nm) | Thicknesses(nm) |
|----------|----------|-----------------|
| BC-0     | 200-500  | 30-60           |
| BC-5     | 80-200   | 30-60           |
| BC-10    | 60-180   | 20-50           |
| BC-15    | 60-180   | 20-50           |

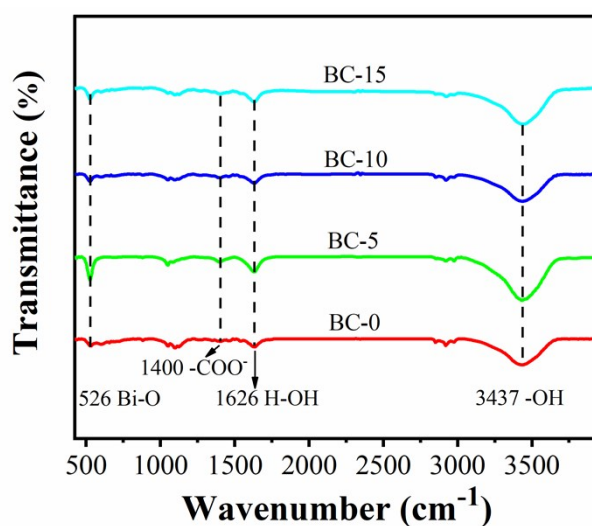

**Fig. S1** The FT-IR spectra of the as-prepared samples.

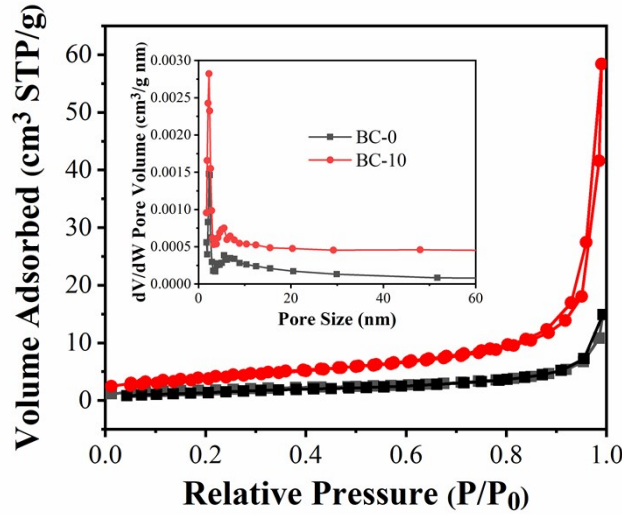

**Fig. S2** Nitrogen adsorption-desorption isotherms and the corresponding pore-size distribution curves (inset) of BC-0 and BC-10.

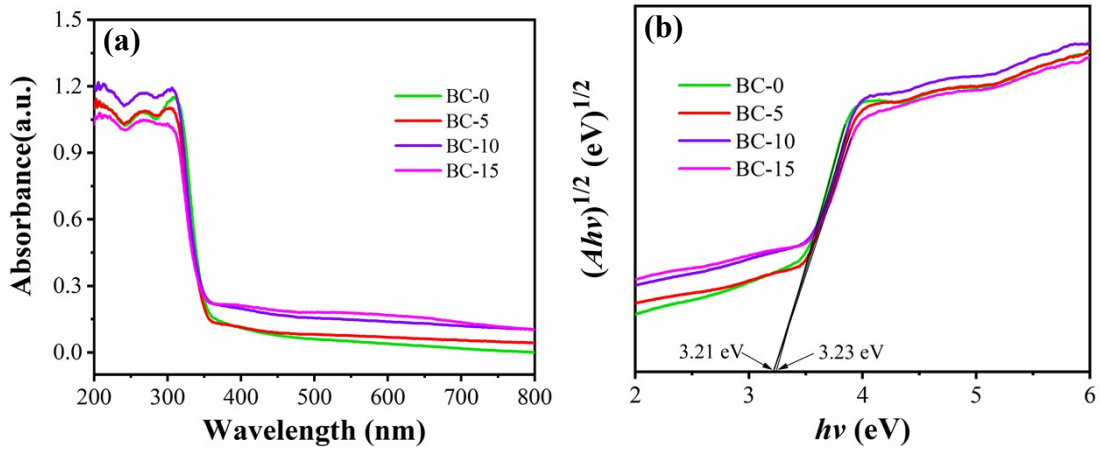

**Fig. S3** (a) UV-vis absorption spectra and (b) band gap maps of different photocatalysts.

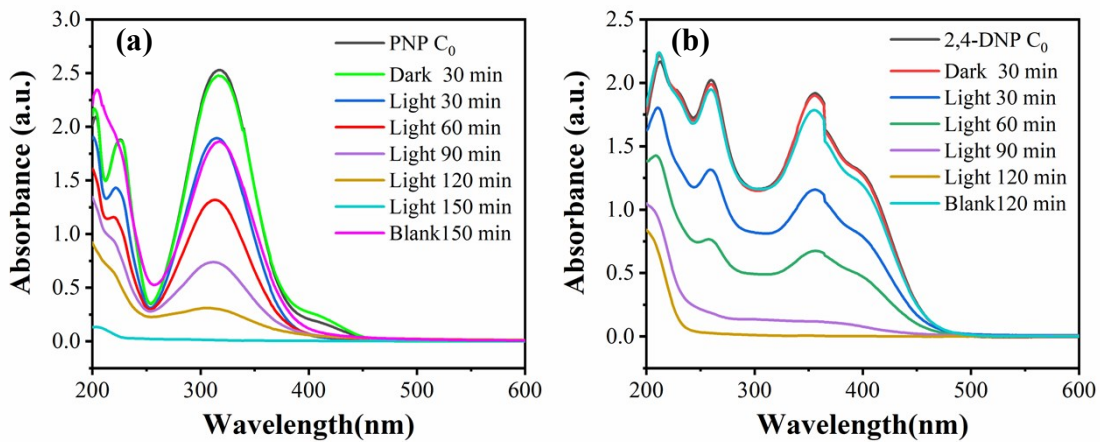

**Fig. S4** Photocatalytic degradation of (a)PNP ( $C=40$  mg/L) and (b) 2,4-DNP ( $C=40$  mg/L) by BC-10 under simulated sunlight.

**Table. S2 Comparison of degradation efficiency of nitro explosives with different catalysts.**

| Catalyst                                                | Substrate | Concentration<br>(mg/L) | Catalysts<br>Concentration(g/L) | Reaction<br>Time(min) | Reference                 |
|---------------------------------------------------------|-----------|-------------------------|---------------------------------|-----------------------|---------------------------|
| BiOCl <sub>1-x</sub> Br <sub>x</sub>                    | PNP       | 10                      | 1                               | 60                    | Qin et al. <sup>48</sup>  |
| BiOCl/<br>Ti <sub>3</sub> C <sub>2</sub> T <sub>x</sub> | PNP       | 20                      | 0.6                             | 50                    | Wang et al. <sup>49</sup> |
| MoSe <sub>2</sub>                                       | PNP       | 40                      | 0.4                             | 90                    | Huang et al. <sup>4</sup> |
| MoSe <sub>2</sub>                                       | 2,4-DNP   | 40                      | 0.4                             | 150                   | Huang et al. <sup>4</sup> |
| MWCNTs/<br>TiO <sub>2</sub>                             | 2,4-DNP   | 38.8                    | 8                               | 150                   | Wang et al. <sup>50</sup> |
| MgO                                                     | 2,4,6-TNP | 30                      | 0.2                             | 124                   | Ali et al. <sup>51</sup>  |
| Nano-TiO <sub>2</sub>                                   | TNT       | 80                      | 5                               | 1440                  | Li et al. <sup>52</sup>   |
| BC-10                                                   | PNP       | 20                      | 0.4                             | 50                    | This work                 |
| BC-10                                                   | PNP       | 40                      | 0.4                             | 150                   | This work                 |
| BC-10                                                   | 2,4-DNP   | 20                      | 0.4                             | 90                    | This work                 |
| BC-10                                                   | 2,4-DNP   | 40                      | 0.4                             | 120                   | This work                 |
| BC-10                                                   | 2,4,6-TNP | 20                      | 0.4                             | 90                    | This work                 |
| BC-10                                                   | TNT       | 20                      | 0.4                             | 90                    | This work                 |

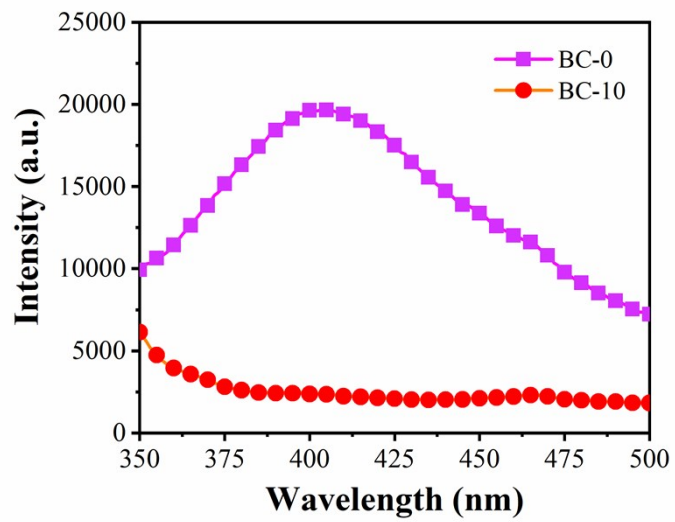

**Fig. S5** The PL spectra of BC-0 and BC-10 ( $\lambda_{\text{exc}} = 320$  nm).
